# Supplementary material
Source: HighWire-hosted journal article supplement (https://svn.smart01.highwire.org/content/9/5/519)
Supplement: inline-supplementary-material-4 [file inline-supplementary-material-4.pdf]

## SUPPLEMENTAL MATERIAL

| <b>Supplemental Table 4. Multivariable COX Proportional Hazard Regression for Survival – Full Table (N=12,337) <sup>*†</sup></b> |                                                        |                    |
|----------------------------------------------------------------------------------------------------------------------------------|--------------------------------------------------------|--------------------|
| Variable                                                                                                                         | Survival since 90 days after Discharge up to 12 months |                    |
|                                                                                                                                  | HR (95% CI)                                            | PH assumption test |
| <i>Systolic Blood Pressure Groupings (mmHg)</i>                                                                                  |                                                        |                    |
| ≤ 105                                                                                                                            | <b>2.07 (1.43, 3.00)</b>                               | .58                |
| 106 to ≤ 115                                                                                                                     | 1.14 (0.83, 1.57)                                      | .11                |
| 116 to ≤ 130                                                                                                                     | 0.91 (0.71, 1.17)                                      | <.001              |
| 131 to ≤ 140                                                                                                                     | 0.82 (0.63, 1.07)                                      | .11                |
| > 140                                                                                                                            | Ref                                                    |                    |
| <i>Sociodemographic</i>                                                                                                          |                                                        |                    |
| Age                                                                                                                              | <b>1.06 (1.05, 1.07)</b>                               | .16                |
| Sex                                                                                                                              |                                                        |                    |
| Female                                                                                                                           | Ref                                                    |                    |
| Male                                                                                                                             | 0.99 (0.58, 1.68)                                      | .68                |
| Race                                                                                                                             |                                                        |                    |
| White                                                                                                                            | Ref                                                    |                    |
| Black                                                                                                                            | 0.97 (0.76, 1.23)                                      | .32                |
| Asian                                                                                                                            | 0.73 (0.18, 2.92)                                      | .68                |
| Other                                                                                                                            | 0.89 (0.22, 3.56)                                      | .63                |
| Unknown                                                                                                                          | 1.22 (0.78, 1.92)                                      | .47                |
| Hispanic                                                                                                                         |                                                        |                    |
| No                                                                                                                               | Ref                                                    |                    |
| <b>Yes</b>                                                                                                                       | <b>0.77 (0.54, 1.10)</b>                               | <.001              |
| <i>Index Cerebrovascular Event – Final Diagnosis</i>                                                                             |                                                        |                    |
| Stroke                                                                                                                           | Ref                                                    |                    |
| TIA                                                                                                                              | <b>0.61 (0.49, 0.75)</b>                               | .32                |
| <i>Healthcare Utilization</i>                                                                                                    |                                                        |                    |
| Number of Admissions in 1-Year prior to Presentation                                                                             | <b>1.20 (1.07, 1.35)</b>                               | .63                |
| Length of Stay                                                                                                                   |                                                        |                    |
| Number of ED Presentations in 1-Year prior to Presentation                                                                       | <b>0.94 (0.89,1.00)</b>                                | .95                |
| <i>Past Medical History<sup>‡</sup></i>                                                                                          |                                                        |                    |
| Hyperlipidemia                                                                                                                   |                                                        |                    |
| No                                                                                                                               | Ref                                                    |                    |
| Yes                                                                                                                              | <b>0.68 (0.56, 0.83)</b>                               | .32                |
| Atrial Fibrillation                                                                                                              |                                                        |                    |
| No                                                                                                                               | Ref                                                    |                    |
| Yes                                                                                                                              | <b>1.27 (1.02, 1.59)</b>                               | .79                |
| OSA                                                                                                                              |                                                        |                    |
| No                                                                                                                               | Ref                                                    |                    |
| Yes                                                                                                                              | <b>0.66 (0.48, 0.91)</b>                               | .16                |

|                                                                                                                                                                                                                                                                                                                                                                                                                                                                                                                                                                                                                                                                               |                          |     |
|-------------------------------------------------------------------------------------------------------------------------------------------------------------------------------------------------------------------------------------------------------------------------------------------------------------------------------------------------------------------------------------------------------------------------------------------------------------------------------------------------------------------------------------------------------------------------------------------------------------------------------------------------------------------------------|--------------------------|-----|
| Dementia                                                                                                                                                                                                                                                                                                                                                                                                                                                                                                                                                                                                                                                                      |                          |     |
| No                                                                                                                                                                                                                                                                                                                                                                                                                                                                                                                                                                                                                                                                            | Ref                      |     |
| Yes                                                                                                                                                                                                                                                                                                                                                                                                                                                                                                                                                                                                                                                                           | <b>1.80 (1.41, 2.29)</b> | .21 |
| CCI                                                                                                                                                                                                                                                                                                                                                                                                                                                                                                                                                                                                                                                                           | <b>1.11 (1.06, 1.16)</b> | .74 |
| APACHE                                                                                                                                                                                                                                                                                                                                                                                                                                                                                                                                                                                                                                                                        | <b>1.02 (1.00, 1.03)</b> | .37 |
| <i>Concomitant illness within 1-day of Cerebrovascular Event Presentation</i>                                                                                                                                                                                                                                                                                                                                                                                                                                                                                                                                                                                                 |                          |     |
| No                                                                                                                                                                                                                                                                                                                                                                                                                                                                                                                                                                                                                                                                            | Ref                      |     |
| Yes                                                                                                                                                                                                                                                                                                                                                                                                                                                                                                                                                                                                                                                                           | <b>1.76 (1.12, 2.76)</b> | .74 |
| <p>* Abbreviations: Hazard Ratio (HR); Confidence Interval (CI); Proportional hazards (PH); Referent (Ref); Transient Ischemic Attack (TIA); Emergency Department (ED); obstructive sleep apnea (OSA); Charlson Comorbidity Index (CCI); Acute Physiology and Chronic Health Evaluation (APACHE).</p> <p>† PH assumption test = proportional hazard assumption test. A p-value ≥.05 indicates that the hazard ratio is constant over time. A p-value &lt; .05 indicates violation of the proportional hazard assumption for the model.</p> <p>‡Past Medical History variables identified by <i>International Classification of Diseases, 9<sup>th</sup> Edition</i> code.</p> |                          |     |
